# Supplementary material for: Obtention of Sacha Inchi (Plukenetia volubilis Linneo) Seed Oil Microcapsules as a Strategy for the Valorization of Amazonian Fruits: Physicochemical, Morphological, and Controlled Release Characterization
Source: MDPI journal article supplement (doi:10.3390/foods11243950), 2022-12-07
Supplement: s1 [file s1]

Table SM1. Experimental design for the preparation of SIO emulsions and experimental design for the obtention of nano and macro-structured microcapsules.

|                                                      | Homogenization technology | Factors                                        | Levels                   |
|------------------------------------------------------|---------------------------|------------------------------------------------|--------------------------|
| Preparation of SIO emulsions                         | Conventional              | %SIO( <i>w/w</i> )                             | 5, 10                    |
|                                                      |                           | Maltodextrine:Sodium caseinate (% <i>w/w</i> ) | 90:10, 85:15, 80:20      |
|                                                      |                           | Speed                                          | 20, turbo                |
|                                                      | Ultrasound probe          | %SIO( <i>w/w</i> )                             | 5, 10                    |
|                                                      |                           | Maltodextrine:Sodium caseinate (% <i>w/w</i> ) | 90:10, 85:15, 80:20      |
|                                                      |                           | Time (min)                                     | 15, 30                   |
| Obtention of nano and macro-structured microcapsules | Spray drying              | Homogenization technology                      | Conventional, ultrasound |
|                                                      | Freeze drying             | Homogenization technology                      | Conventional, ultrasound |
